# Supplementary material for: Development and validation of SEER (Seeking, Engaging with and Evaluating Research): a measure of policymakers’ capacity to engage with and use research
Source: PubMed Central journal article supplement (PMC5240393; doi:10.1186/s12961-016-0162-8), 2017-01-17

# Empirical distributions of responses to SEER and TPB scales

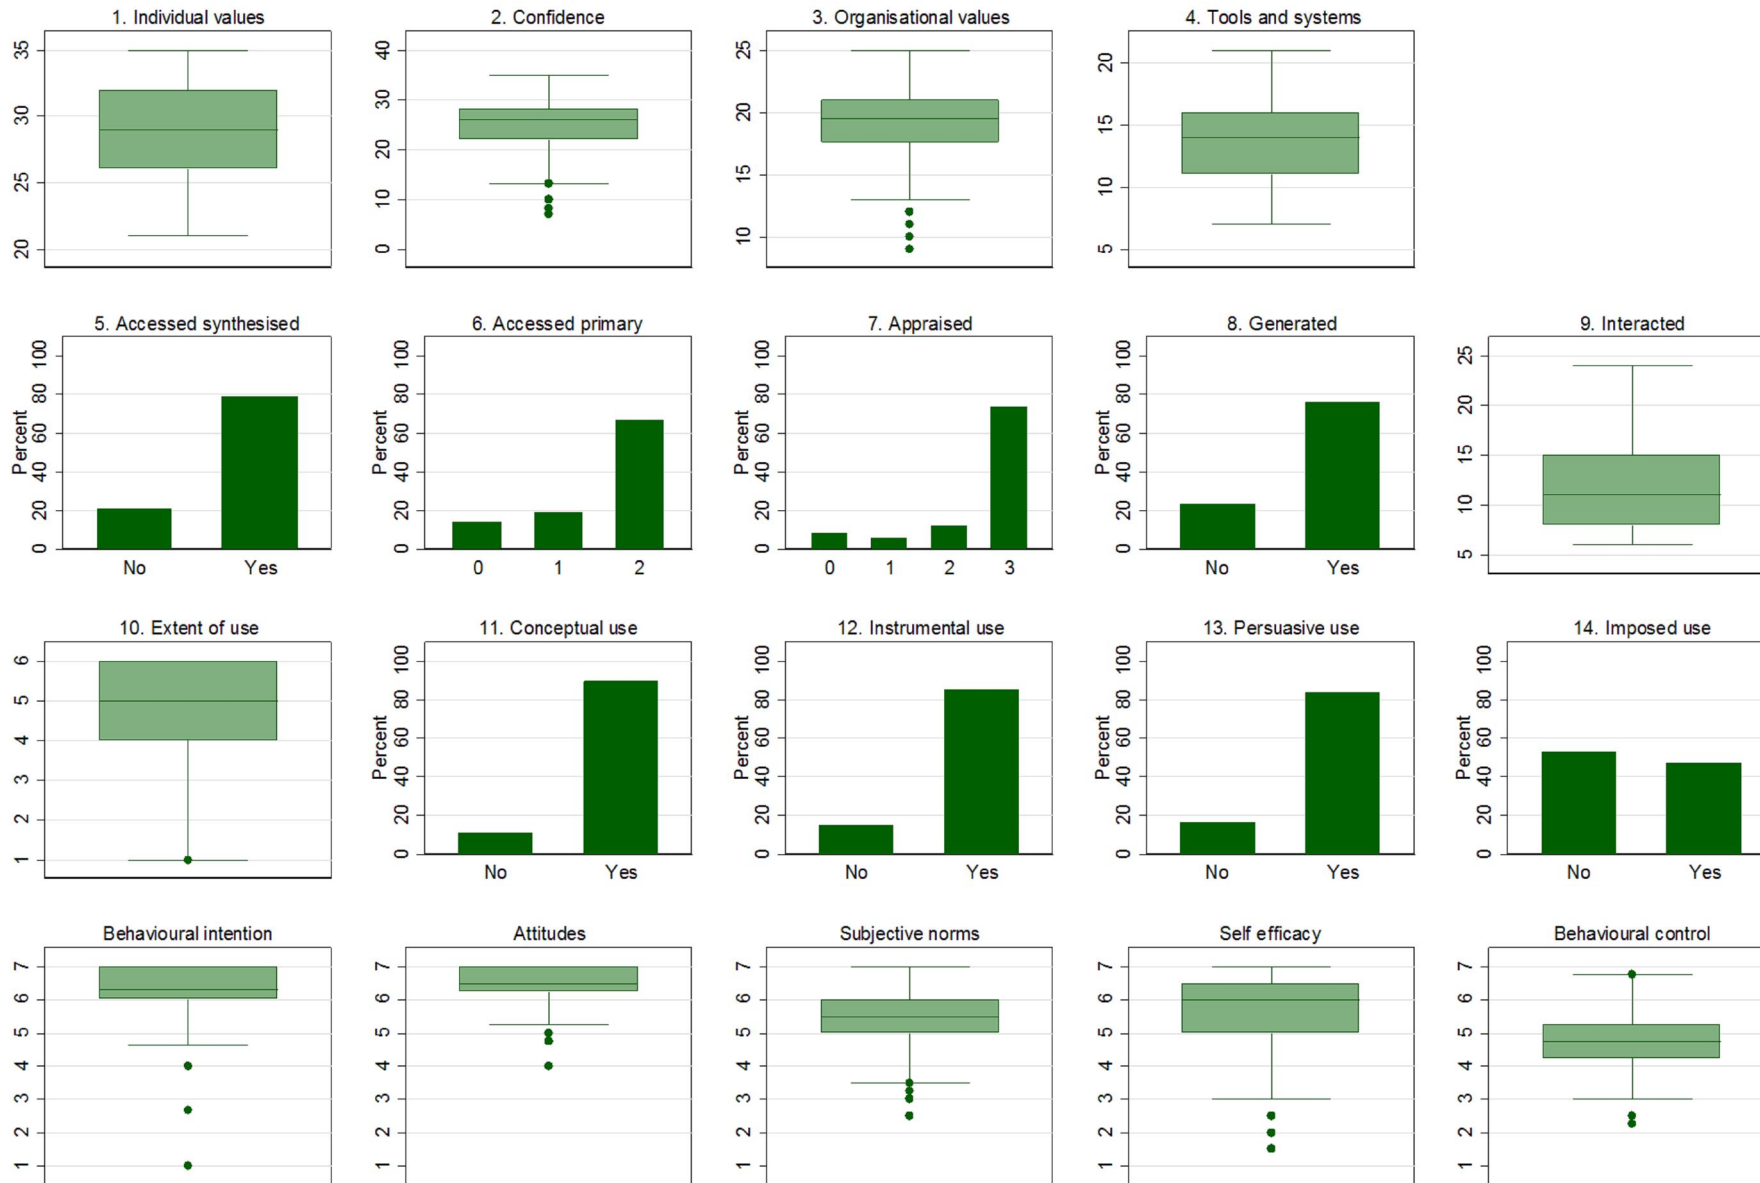

Supplement: 12961_2016_162_MOESM4_ESM.pdf [file 12961_2016_162_MOESM4_ESM.pdf]
