# Supplementary material for: TAKING VAR TO PIECES
Source: Springer Nature journal article supplement (doi:10.1186/s12961-016-0162-8), 1998-01-01

# Plots of the association between SEER capacity scales and TPB measures

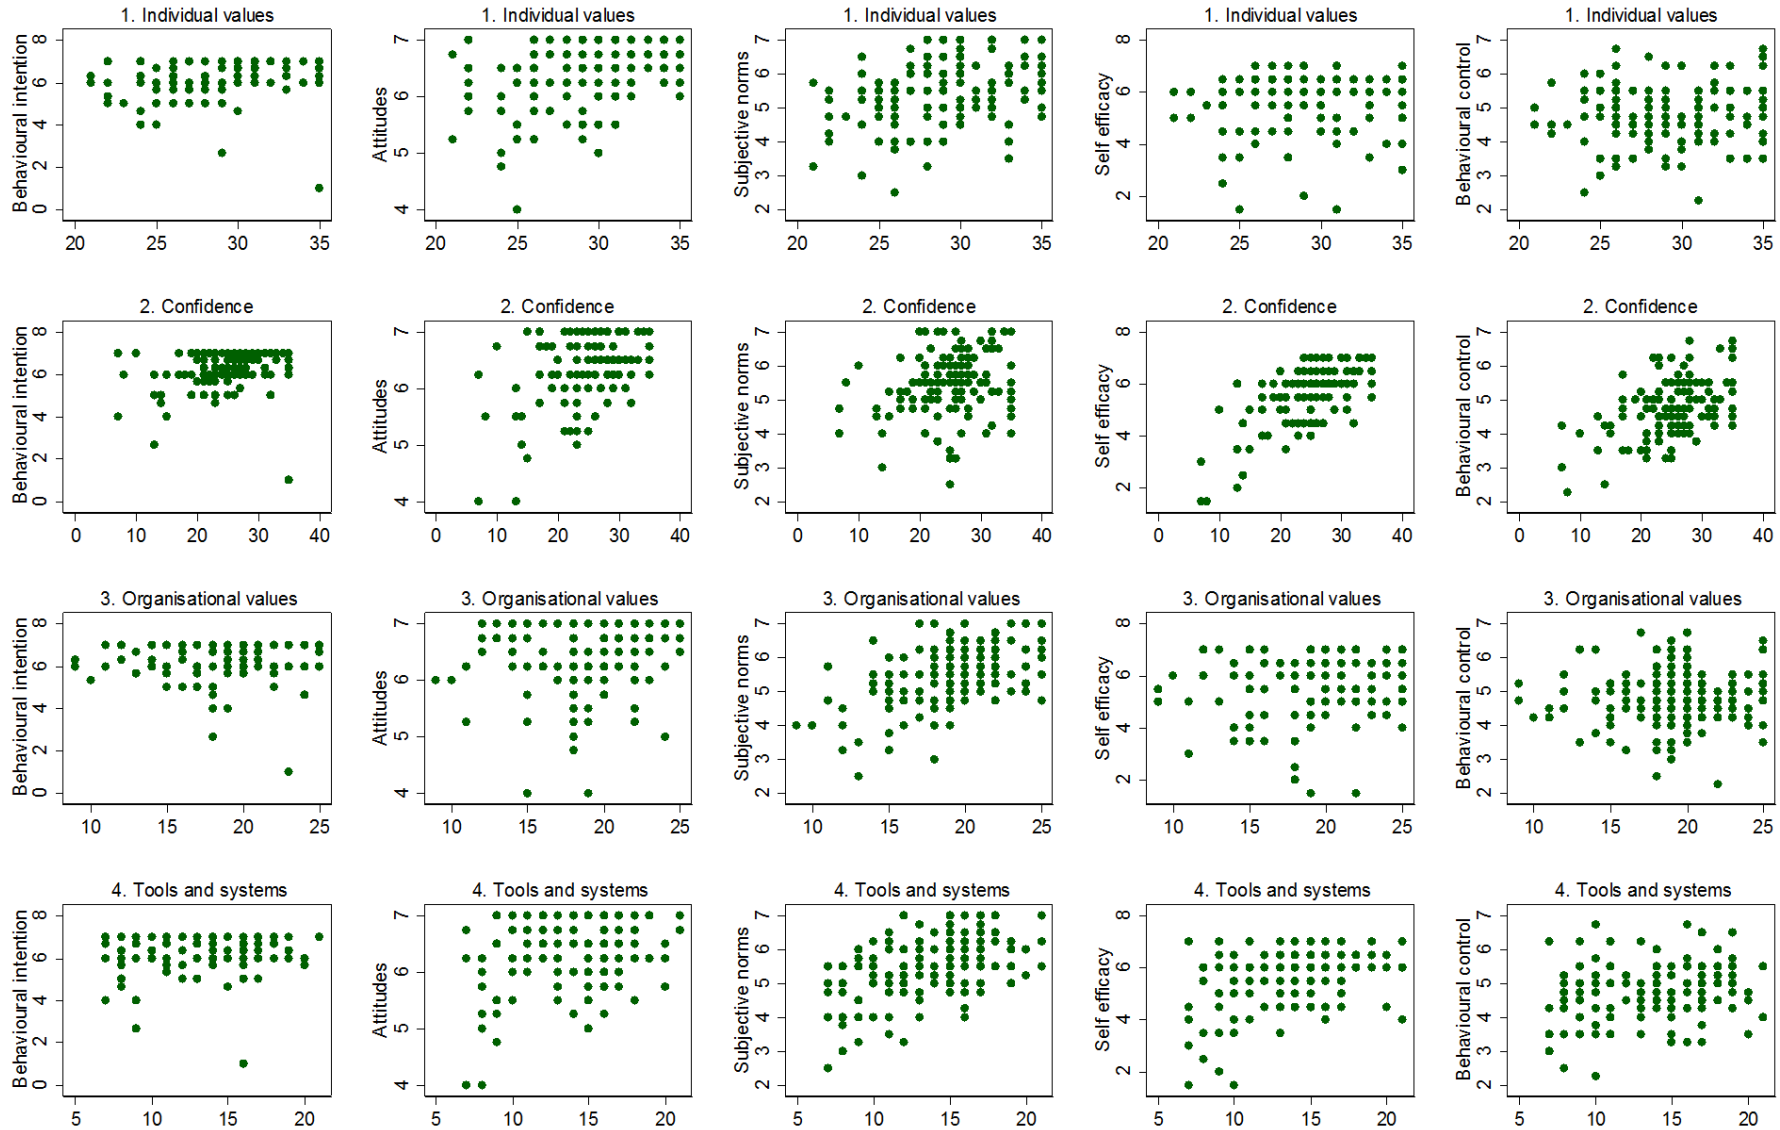

# Plots of the association between SEER research engagement scales and TPB measures

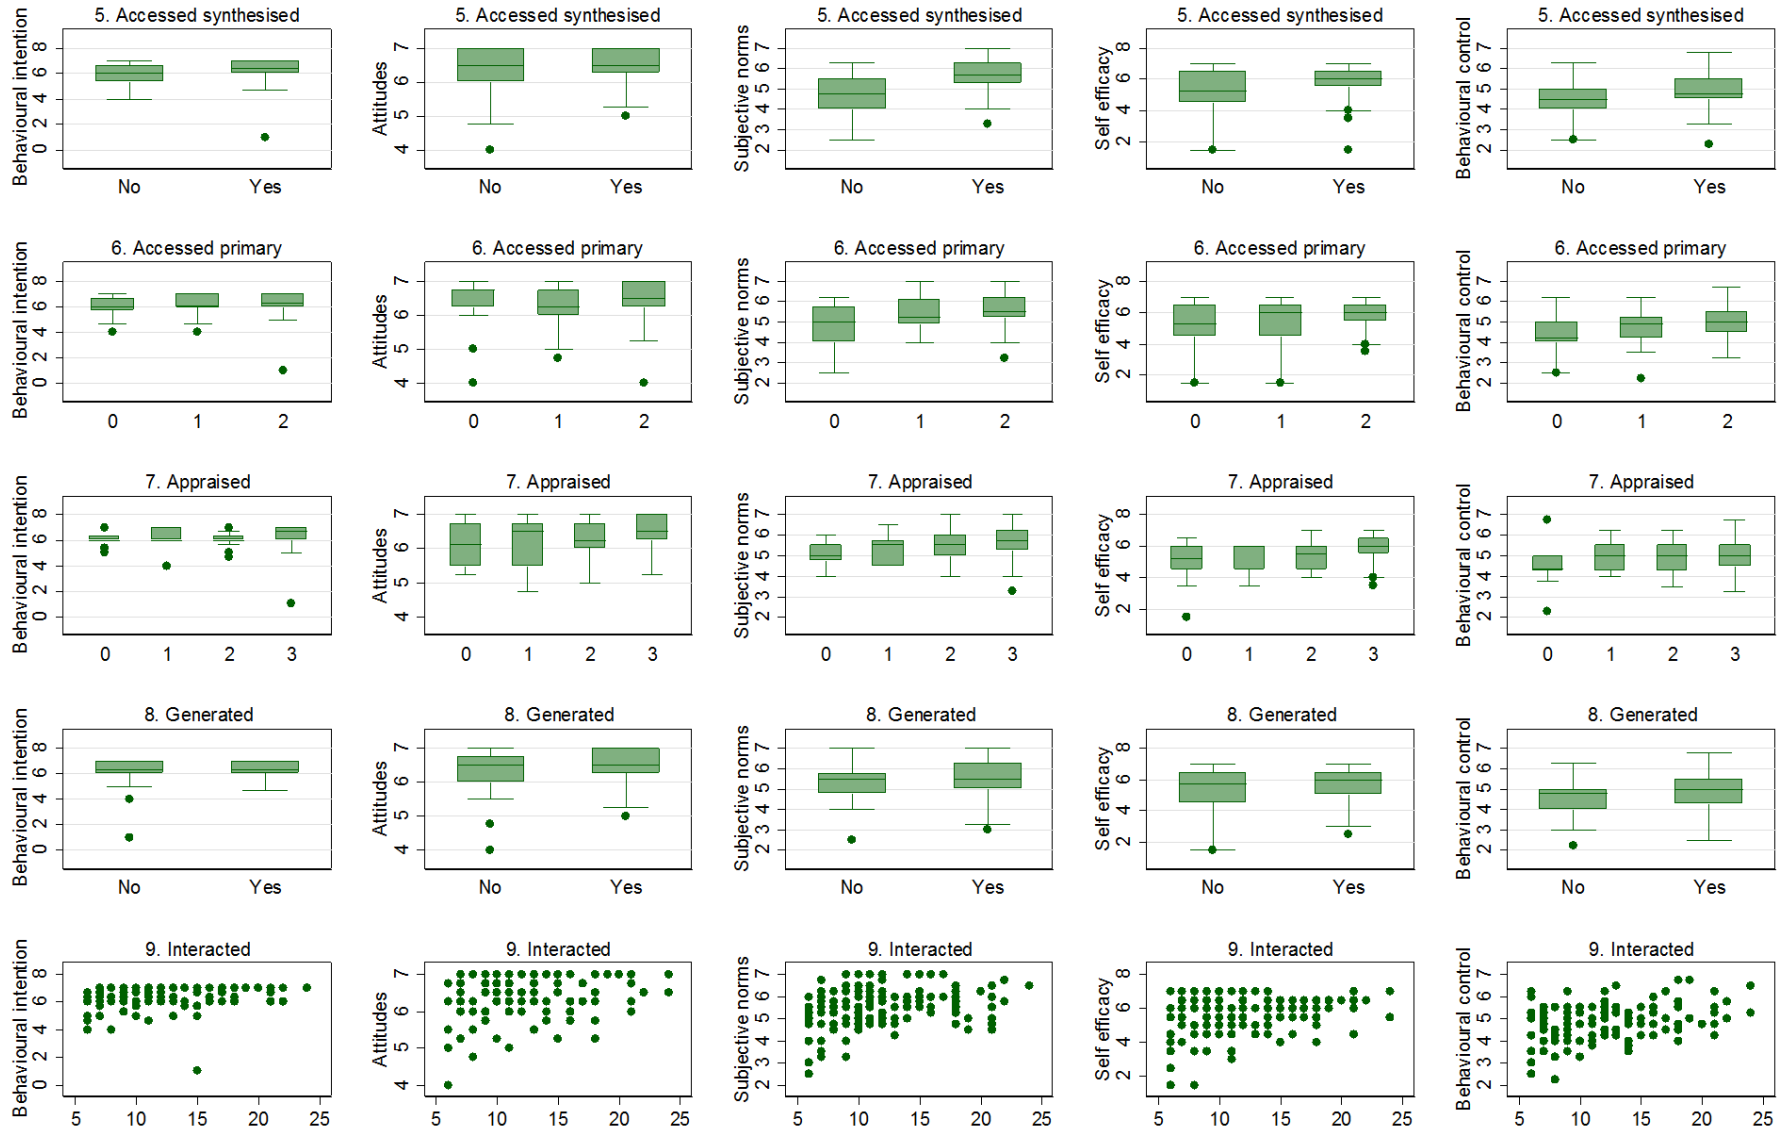

# Plots of the association between SEER research use scales and TPB measures

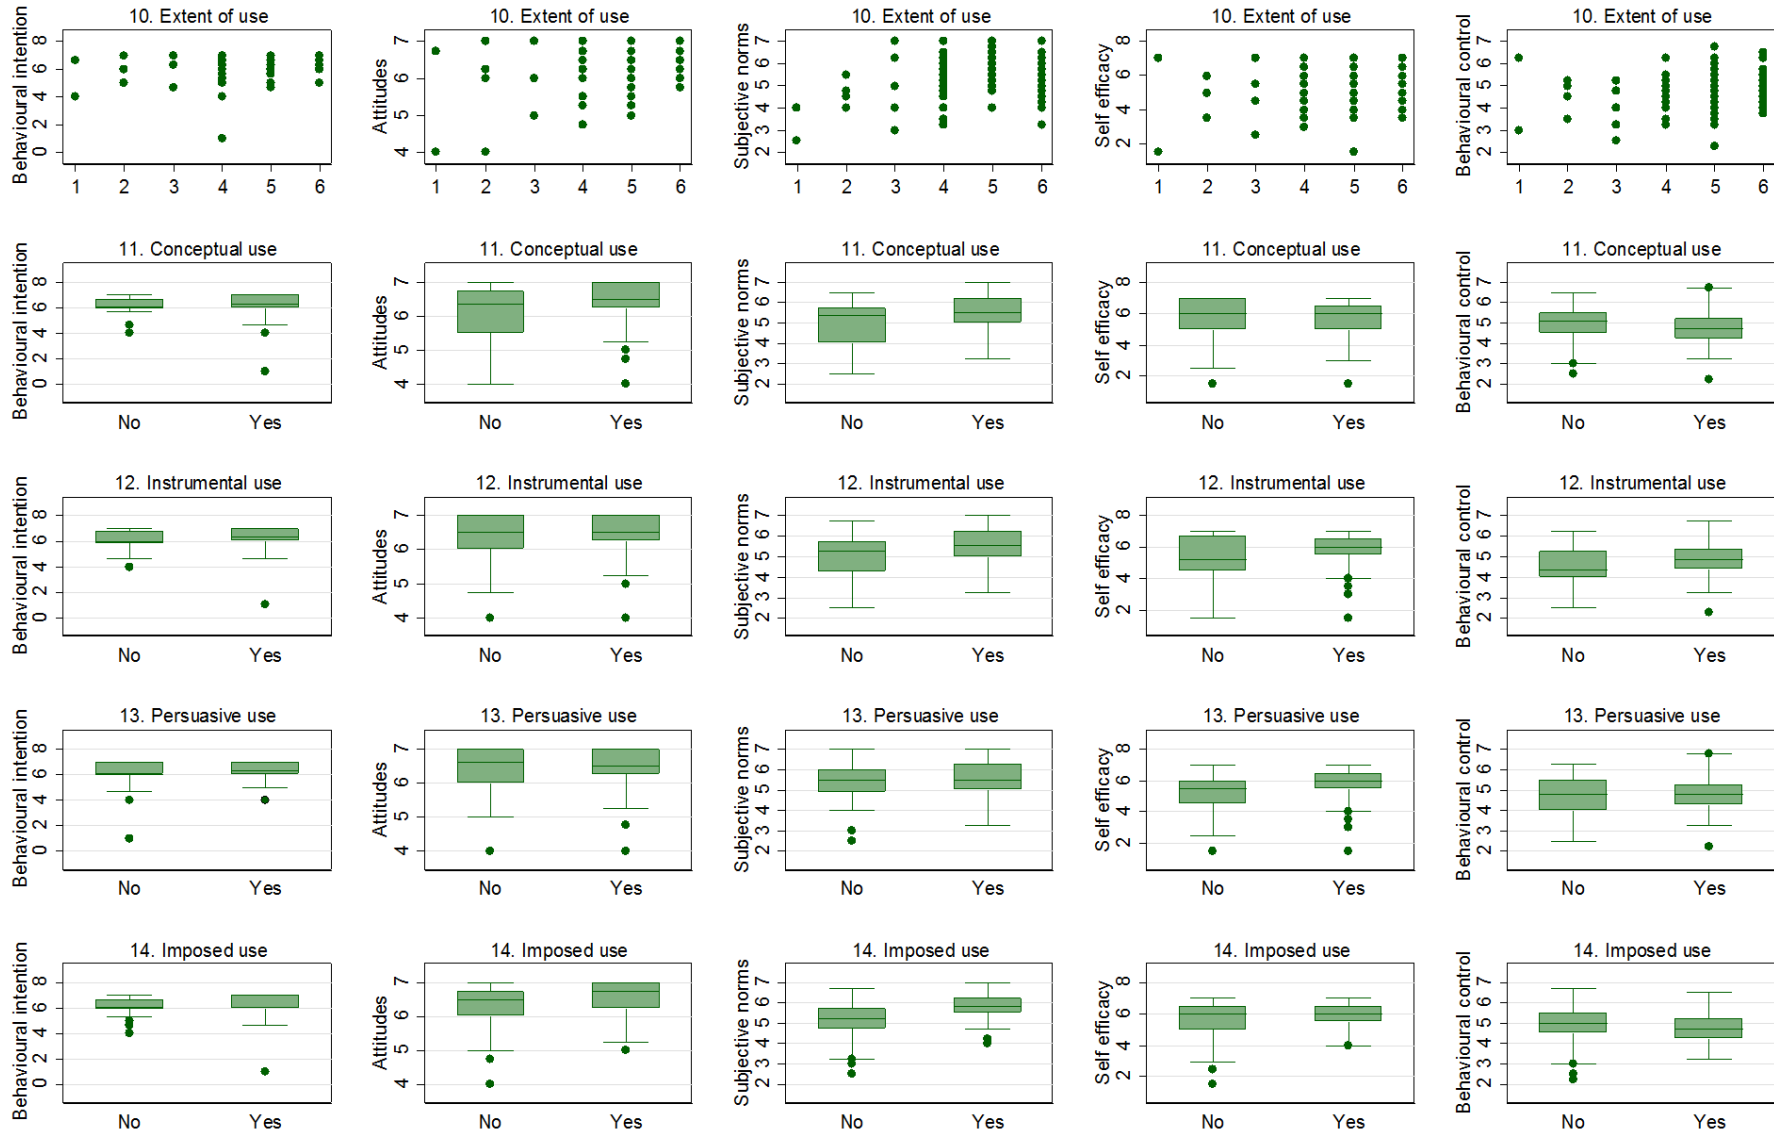

Supplement: MOESM6 [file 12003628]
